# Supplementary material for: Malignant Evaluation and Clinical Prognostic Values of m6A RNA Methylation Regulators in Glioblastoma
Source: Front Oncol. 2020 Mar 9;10:208. doi: 10.3389/fonc.2020.00208 (PMC7075451; doi:10.3389/fonc.2020.00208)
Supplement: Supplementary file 4 [file Table_3.XLSX]

## Sheet: Up-DEGs
Upregulated differentially expressed genes in RM2 subgroup
Id	logFC	AveExpr	t	P.Value	adj.P.Val	B
WDR81	-2.14179	4.85519	-8.76804	1.98043e-15	9.9968e-13	24.2548
TBC1D9B	-5.25504	15.5341	-8.52235	8.76478e-15	3.33424e-12	22.7849
PLEC	-10.4915	17.0068	-8.10372	1.06507e-13	2.51861e-11	20.3189
AGPAT3	-3.94288	11.1047	-8.07469	1.26411e-13	2.92343e-11	20.1498
MINK1	-6.80551	15.5146	-7.81425	5.8111e-13	1.07837e-10	18.6454
CLCN7	-3.43181	9.60538	-7.6228	1.75875e-12	2.71556e-10	17.5541
KIF13B	-2.0373	4.12007	-7.50612	3.43308e-12	4.79326e-10	16.8953
TMEM127	-4.0832	17.7353	-7.28581	1.19778e-11	1.36696e-09	15.6654
SLC38A10	-3.46922	10.6207	-7.27597	1.26599e-11	1.43234e-09	15.6109
ZBTB7A	-2.0486	5.65326	-7.22165	1.71776e-11	1.8668e-09	15.3108
NDST1	-5.94533	15.732	-7.14753	2.60011e-11	2.65739e-09	14.9032
SLC9A1	-2.57968	6.68591	-7.06272	4.16746e-11	3.93488e-09	14.4395
RUBCN	-2.42729	6.84637	-7.05333	4.39002e-11	4.11541e-09	14.3883
ARAP1	-3.74612	10.1446	-7.04481	4.60229e-11	4.29141e-09	14.3419
AP1B1	-9.98181	27.554	-6.96013	7.34589e-11	6.44878e-09	13.8825
MAN2B2	-2.39253	7.11278	-6.93987	8.21187e-11	7.07879e-09	13.7731
TAPBP	-13.3956	33.7183	-6.93361	8.49911e-11	7.29049e-09	13.7393
PLXND1	-8.45056	15.6669	-6.9103	9.65922e-11	8.17871e-09	13.6137
SIRPA	-15.1089	39.6895	-6.89791	1.03378e-10	8.67231e-09	13.547
LARP1	-6.83549	20.5503	-6.87432	1.17632e-10	9.70966e-09	13.4202
ATP13A2	-5.46536	17.4554	-6.83331	1.47153e-10	1.17403e-08	13.2003
CHST15	-2.65896	5.7389	-6.81485	1.62723e-10	1.28652e-08	13.1016
TPCN1	-3.48097	8.00457	-6.81103	1.6614e-10	1.31156e-08	13.0812
TLN1	-12.8977	31.213	-6.79025	1.86017e-10	1.43819e-08	12.9703
PACS1	-3.23964	11.2143	-6.78562	1.90756e-10	1.46835e-08	12.9456
SLC23A2	-5.07916	13.5546	-6.75653	2.23375e-10	1.68408e-08	12.7907
GSN	-21.7901	39.1149	-6.75199	2.28931e-10	1.71199e-08	12.7666
TRIM8	-8.53351	26.0018	-6.74558	2.3703e-10	1.75506e-08	12.7325
TFE3	-7.68435	26.784	-6.70563	2.94164e-10	2.1271e-08	12.5207
KIAA0319L	-2.7443	9.34004	-6.70063	3.02216e-10	2.17931e-08	12.4942
ZDHHC7	-3.12522	12.2151	-6.69441	3.12516e-10	2.24741e-08	12.4613
PIEZO1	-3.23392	6.55983	-6.57795	5.83911e-10	3.81263e-08	11.8484
PLBD2	-7.58902	16.4392	-6.57611	5.89704e-10	3.8409e-08	11.8387
CAMTA2	-2.94726	8.4521	-6.57419	5.95772e-10	3.87246e-08	11.8287
TGOLN2	-9.78383	29.4489	-6.57042	6.07867e-10	3.93506e-08	11.809
LYNX1	-5.44512	8.37627	-6.55969	6.43688e-10	4.15131e-08	11.7529
NACC2	-9.06014	18.7459	-6.53146	7.4817e-10	4.74356e-08	11.6054
RHBDF2	-3.83981	6.45009	-6.51161	8.31451e-10	5.20868e-08	11.502
FMNL1	-2.12841	3.73785	-6.43598	1.2409e-09	7.37754e-08	11.1098
TK2	-2.02201	7.00363	-6.4357	1.24273e-09	7.38005e-08	11.1084
NAT8L	-10.072	17.3767	-6.43333	1.25837e-09	7.4645e-08	11.0961
IPO13	-4.84884	18.3143	-6.41193	1.40868e-09	8.1986e-08	10.9856
FBRS	-2.7243	10.3703	-6.37841	1.68019e-09	9.60837e-08	10.8131
GRK2	-3.8539	14.2041	-6.37311	1.72758e-09	9.84723e-08	10.7858
CTTN	-5.41709	20.0936	-6.36768	1.77751e-09	1.00989e-07	10.7579
RIPOR1	-2.86086	11.4728	-6.36042	1.84652e-09	1.04458e-07	10.7206
ABR	-6.69271	17.1007	-6.35923	1.85801e-09	1.04994e-07	10.7146
PDXK	-3.87067	12.4935	-6.35523	1.89739e-09	1.07105e-07	10.694
SIPA1	-4.3497	11.6162	-6.35162	1.93363e-09	1.09033e-07	10.6755
MAFG	-2.73189	8.20242	-6.34567	1.99483e-09	1.11883e-07	10.645
TACC1	-3.46338	8.17259	-6.29999	2.53263e-09	1.38768e-07	10.4114
ARHGAP1	-7.90153	25.1453	-6.29273	2.63025e-09	1.43534e-07	10.3744
NFE2L1	-13.5288	45.8344	-6.29053	2.66052e-09	1.44735e-07	10.3632
EML3	-3.03171	10.9716	-6.28326	2.7632e-09	1.49544e-07	10.3262
WDTC1	-3.18538	12.046	-6.26467	3.04384e-09	1.6322e-07	10.2316
NUDT16	-3.21185	9.63886	-6.24909	3.30029e-09	1.76072e-07	10.1524
DNAJC5	-7.38462	25.3513	-6.23777	3.49987e-09	1.84471e-07	10.095
SRCAP	-2.74139	8.17894	-6.20776	4.08827e-09	2.10827e-07	9.94305
MT-ND4L	-953.048	1880.16	-6.18369	4.62939e-09	2.34811e-07	9.82151
PPARD	-5.69657	19.2173	-6.16474	5.10414e-09	2.55192e-07	9.72608
PALD1	-5.90071	14.1467	-6.15178	5.4563e-09	2.68202e-07	9.66086
ARHGAP45	-2.45583	5.42638	-6.0764	8.02869e-09	3.72993e-07	9.28344
IQSEC1	-4.31838	10.8046	-6.05216	9.08519e-09	4.18006e-07	9.16268
SORL1	-4.35903	9.07323	-6.04147	9.59331e-09	4.3793e-07	9.10953
PLCB2	-2.41894	4.22134	-6.02303	1.05358e-08	4.74354e-07	9.01802
MT-ND5	-783.365	1481.94	-6.0168	1.08743e-08	4.88755e-07	8.98714
TOM1L2	-3.79663	10.1818	-6.00588	1.1494e-08	5.12661e-07	8.93303
PLXNB2	-11.3485	28.1245	-6.00473	1.1561e-08	5.14712e-07	8.92735
PRKCD	-3.18559	7.00437	-6.00454	1.15725e-08	5.14712e-07	8.92638
MT-ND4	-2376.95	4820.63	-5.99012	1.24495e-08	5.49903e-07	8.85506
ARHGAP4	-2.7386	5.50164	-5.971	1.37132e-08	5.98429e-07	8.7607
CSNK1D	-3.10578	16.7998	-5.96635	1.40391e-08	6.10106e-07	8.73777
TEX2	-2.01747	6.88731	-5.96379	1.42222e-08	6.17045e-07	8.72512
HUWE1	-4.27807	12.2217	-5.96169	1.43736e-08	6.22072e-07	8.71478
HGSNAT	-3.05986	8.09379	-5.9601	1.44896e-08	6.25544e-07	8.70694
KIAA0930	-4.14062	9.98896	-5.95075	1.51892e-08	6.51991e-07	8.66093
RNPEPL1	-2.33342	9.32964	-5.94314	1.57828e-08	6.76369e-07	8.62351
GRAMD4	-3.08134	8.8289	-5.92336	1.74356e-08	7.3995e-07	8.52633
PXN	-3.99295	12.3748	-5.90669	1.89581e-08	7.94924e-07	8.44465
MEF2D	-3.08649	9.25083	-5.90148	1.94608e-08	8.13402e-07	8.41912
PFKFB3	-14.9948	36.5085	-5.89455	2.01485e-08	8.37478e-07	8.38525
MEF2A	-2.36947	8.1621	-5.88945	2.06707e-08	8.56473e-07	8.36029
MED15	-2.15346	7.60058	-5.88434	2.12065e-08	8.7522e-07	8.33532
SERINC3	-7.48707	37.7653	-5.86823	2.29867e-08	9.40555e-07	8.25671
WASF2	-9.16459	31.6204	-5.85233	2.48873e-08	1.00735e-06	8.17924
BAIAP2-DT	-2.62263	7.3343	-5.84884	2.53247e-08	1.02189e-06	8.16225
ABCD1	-2.04422	5.62096	-5.84054	2.6395e-08	1.06181e-06	8.12189
IL17RA	-2.11717	4.52072	-5.82641	2.83195e-08	1.12712e-06	8.05327
RAPGEF1	-5.72767	17.5832	-5.79828	3.25703e-08	1.27315e-06	7.91695
PNPLA2	-4.77705	16.4408	-5.79568	3.29936e-08	1.28778e-06	7.90436
PI4K2A	-2.06883	7.12817	-5.7902	3.39018e-08	1.31735e-06	7.8779
MAP7D1	-7.30079	31.7864	-5.77584	3.64035e-08	1.40417e-06	7.80852
PIGQ	-2.82779	9.26487	-5.76368	3.8661e-08	1.48362e-06	7.74989
NISCH	-4.07441	14.3443	-5.73991	4.34771e-08	1.64439e-06	7.6355
RAB11FIP5	-2.01751	6.80642	-5.72325	4.71971e-08	1.76099e-06	7.55553
TTC7A	-2.09485	6.60717	-5.71628	4.88429e-08	1.81081e-06	7.52215
MAF	-3.23009	8.73942	-5.71289	4.96664e-08	1.83615e-06	7.50586
NPLOC4	-2.24217	11.8447	-5.71198	4.98886e-08	1.84307e-06	7.50152
MBOAT7	-4.75693	18.2566	-5.70018	5.28656e-08	1.94484e-06	7.44507
TMEM104	-2.18043	8.19546	-5.69298	5.47685e-08	2.00641e-06	7.41064
TMEM63A	-2.0845	3.55163	-5.69209	5.50074e-08	2.01235e-06	7.4064
ARSA	-4.05776	12.2644	-5.68409	5.72089e-08	2.08273e-06	7.36819
HEG1	-3.41332	7.56374	-5.64402	6.95988e-08	2.47552e-06	7.17735
MT-CO1	-2836.55	6424.15	-5.63893	7.13501e-08	2.53257e-06	7.15316
MGAT5	-2.80145	8.11965	-5.62937	7.4755e-08	2.63647e-06	7.10779
GAA	-11.8606	27.6624	-5.61619	7.97079e-08	2.79067e-06	7.04536
WFS1	-6.58594	14.569	-5.61612	7.97381e-08	2.79067e-06	7.04499
MYH9	-22.6053	40.7741	-5.598	8.70797e-08	3.01148e-06	6.9593
MAN2A2	-2.44749	7.90521	-5.55054	1.0958e-07	3.68759e-06	6.73574
TRIM56	-2.73553	6.14686	-5.53987	1.15374e-07	3.8652e-06	6.68565
AHNAK	-6.07745	10.4518	-5.51838	1.2796e-07	4.23284e-06	6.58498
SLC35F6	-4.04889	17.7069	-5.49725	1.41634e-07	4.64393e-06	6.48629
FURIN	-7.20806	16.6884	-5.48947	1.47026e-07	4.79108e-06	6.44998
ANKRD52	-3.29865	8.51773	-5.48654	1.49103e-07	4.84972e-06	6.43635
GOLGB1	-2.16279	6.68646	-5.48254	1.51991e-07	4.93239e-06	6.4177
DST	-2.36126	5.36026	-5.4798	1.54002e-07	4.99052e-06	6.40493
STIM1	-2.83718	10.0911	-5.47026	1.61199e-07	5.20447e-06	6.36055
MAP4	-10.2994	38.9815	-5.46719	1.63581e-07	5.27488e-06	6.3463
ITGAM	-2.90201	4.81523	-5.44871	1.78689e-07	5.69215e-06	6.26047
LTBP3	-11.6331	28.0936	-5.44441	1.82388e-07	5.79589e-06	6.24057
MYO1F	-2.39693	4.53829	-5.43203	1.93482e-07	6.10043e-06	6.18322
ARHGAP30	-2.6853	4.6985	-5.41147	2.13361e-07	6.65922e-06	6.08824
PLEKHM2	-7.18772	31.3451	-5.40525	2.19764e-07	6.8347e-06	6.05952
ZBTB4	-4.64357	18.0657	-5.40511	2.19905e-07	6.83503e-06	6.0589
PTK2B	-4.14085	7.6062	-5.38894	2.37449e-07	7.31174e-06	5.98437
C6orf106	-4.36096	17.7024	-5.38099	2.46558e-07	7.5605e-06	5.94783
GRIPAP1	-2.23708	8.00334	-5.35822	2.74582e-07	8.27958e-06	5.84334
MFSD12	-2.96091	11.0396	-5.35385	2.80315e-07	8.43789e-06	5.82329
SCAMP2	-3.61755	18.6756	-5.35076	2.84428e-07	8.55681e-06	5.80915
EIF4G1	-9.44651	35.6212	-5.3503	2.85041e-07	8.56051e-06	5.80706
EHBP1L1	-2.52129	5.02622	-5.34963	2.85945e-07	8.58276e-06	5.80399
AC004656.1	-2.11479	4.91749	-5.32492	3.2125e-07	9.47774e-06	5.69103
TAOK2	-2.51815	9.12015	-5.31329	3.39287e-07	9.94201e-06	5.63804
MT-ND6	-880.366	1916.12	-5.31315	3.39507e-07	9.94201e-06	5.63741
SH2B3	-3.57781	8.93962	-5.29863	3.63458e-07	1.05592e-05	5.57129
GRINA	-26.1056	115.132	-5.27885	3.98725e-07	1.1501e-05	5.48148
KLF13	-2.84317	8.65329	-5.27453	4.0686e-07	1.16779e-05	5.46189
FAM160B2	-2.14694	7.38588	-5.26808	4.19302e-07	1.19957e-05	5.43269
PLA2G15	-2.73365	8.94786	-5.26468	4.26012e-07	1.21659e-05	5.4173
FLII	-4.50561	18.7346	-5.25505	4.45581e-07	1.26373e-05	5.37376
SLC15A3	-2.9425	6.10771	-5.25453	4.46681e-07	1.26617e-05	5.37137
RPS6KA4	-2.28127	9.56358	-5.25005	4.56099e-07	1.28938e-05	5.35114
MGRN1	-2.65719	10.3821	-5.23564	4.87754e-07	1.36782e-05	5.2861
CASKIN2	-2.6616	8.37239	-5.22942	5.02059e-07	1.40269e-05	5.25809
NFIC	-6.8115	21.3175	-5.21871	5.2767e-07	1.46257e-05	5.20988
ITPKB	-15.8701	29.7285	-5.21856	5.28039e-07	1.46282e-05	5.2092
ATP6V0A1	-3.47449	12.2085	-5.2074	5.56092e-07	1.53165e-05	5.15904
MAP1A	-11.3998	19.7931	-5.20104	5.72708e-07	1.57082e-05	5.13052
CDV3	-7.27335	29.0079	-5.19728	5.82779e-07	1.59262e-05	5.11363
ZBTB47	-5.55105	14.6156	-5.17681	6.40608e-07	1.72994e-05	5.02199
ANKH	-3.29646	7.80561	-5.15865	6.96582e-07	1.8591e-05	4.94087
FAM53B	-2.00528	5.4559	-5.15834	6.97554e-07	1.86075e-05	4.93952
KIF3B	-3.50357	13.5915	-5.15821	6.97968e-07	1.8609e-05	4.93895
AL591895.1	-2.94408	6.89186	-5.15273	7.15804e-07	1.90074e-05	4.91452
SNPH	-2.53656	5.12239	-5.15063	7.22778e-07	1.91248e-05	4.90513
TMEM184B	-5.48645	18.1402	-5.146	7.38325e-07	1.94871e-05	4.88452
GM2A	-6.96246	24.6826	-5.14045	7.57397e-07	1.99004e-05	4.85983
MAVS	-2.86897	10.606	-5.13836	7.64731e-07	2.00831e-05	4.8505
SLC12A7	-2.58792	7.36048	-5.13459	7.78062e-07	2.03822e-05	4.83378
XPO6	-3.8427	17.7636	-5.1291	7.97933e-07	2.08093e-05	4.80936
MVP	-6.92162	15.7324	-5.12765	8.03248e-07	2.0896e-05	4.80294
BHLHE41	-9.60603	22.0179	-5.11806	8.39349e-07	2.17061e-05	4.76039
SAMD4B	-4.04056	16.4385	-5.11731	8.42269e-07	2.17601e-05	4.75703
PTPN23	-3.84704	14.1888	-5.11003	8.70812e-07	2.24644e-05	4.72477
MLLT6	-2.46466	8.00264	-5.10488	8.91555e-07	2.29544e-05	4.70199
TEX261	-6.11383	31.1159	-5.10195	9.03617e-07	2.32458e-05	4.68899
POLR2A	-6.76744	24.0461	-5.10031	9.10398e-07	2.33593e-05	4.68176
ZBTB7B	-2.57692	6.60685	-5.079	1.00344e-06	2.53084e-05	4.58762
TBC1D16	-2.70015	7.38921	-5.07659	1.01449e-06	2.55555e-05	4.57702
GBF1	-2.95058	9.73966	-5.06522	1.06842e-06	2.66778e-05	4.52692
SCARA3	-24.3052	52.6619	-5.06352	1.07671e-06	2.68268e-05	4.51945
ARHGEF17	-2.80029	8.15545	-5.04875	1.15147e-06	2.85539e-05	4.45453
SPOCK2	-23.6926	39.5198	-5.04717	1.15973e-06	2.87453e-05	4.44762
BICD2	-2.01527	6.86141	-5.03253	1.23936e-06	3.05459e-05	4.38341
MACF1	-2.02745	6.08694	-5.03118	1.24699e-06	3.0705e-05	4.37748
FLNA	-35.296	80.8778	-5.03054	1.25059e-06	3.07648e-05	4.37469
MAFK	-2.05467	4.66901	-4.99563	1.4643e-06	3.54082e-05	4.22221
OTUD5	-3.60926	22.0519	-4.9925	1.48514e-06	3.58461e-05	4.20856
MYOF	-3.37008	6.36265	-4.99112	1.49441e-06	3.60202e-05	4.20254
ANXA11	-2.35602	7.29769	-4.97366	1.61656e-06	3.86627e-05	4.12664
ABCA2	-9.93586	16.0076	-4.97335	1.61881e-06	3.86988e-05	4.12529
CLUH	-2.62241	10.0568	-4.96736	1.66291e-06	3.9573e-05	4.09933
IL4R	-2.59676	5.16882	-4.96501	1.68058e-06	3.9921e-05	4.08912
PPP1R9B	-5.64997	23.6731	-4.9647	1.68295e-06	3.99592e-05	4.08776
CD99L2	-5.0982	24.7023	-4.9533	1.77127e-06	4.18149e-05	4.03836
MOB3A	-3.29238	15.5425	-4.91504	2.10165e-06	4.87541e-05	3.87323
PNPLA6	-3.21895	13.3673	-4.90879	2.16103e-06	4.9867e-05	3.84634
PITPNM1	-2.20873	6.22959	-4.90027	2.2446e-06	5.15236e-05	3.80972
PC	-2.83696	8.09998	-4.89885	2.25888e-06	5.17835e-05	3.8036
MYO1C	-2.60802	6.8202	-4.89855	2.26188e-06	5.1807e-05	3.80232
SUSD6	-4.52834	13.6469	-4.89845	2.26287e-06	5.18072e-05	3.8019
VPS9D1	-2.7235	10.2413	-4.87897	2.4674e-06	5.5953e-05	3.7184
MAP3K5	-3.39882	7.85926	-4.87449	2.51697e-06	5.69294e-05	3.69922
ADAM15	-3.78682	12.8588	-4.85769	2.71141e-06	6.10382e-05	3.62744
TRIM14	-2.76643	8.47476	-4.85416	2.75402e-06	6.19177e-05	3.6124
SRRM2	-11.7176	32.7477	-4.84513	2.86616e-06	6.41641e-05	3.57391
VPS18	-2.27661	11.0603	-4.83368	3.01468e-06	6.72023e-05	3.5252
SYVN1	-2.36326	12.4022	-4.81019	3.34301e-06	7.3925e-05	3.42555
APOL2	-7.80793	21.3913	-4.80488	3.42192e-06	7.54793e-05	3.40306
CSF1R	-21.4124	40.3992	-4.80302	3.44993e-06	7.59374e-05	3.3952
CSK	-3.02207	15.7161	-4.8014	3.47458e-06	7.6448e-05	3.38834
NEAT1	-5.93539	9.79557	-4.80121	3.47746e-06	7.64793e-05	3.38755
CELSR2	-4.68135	13.2285	-4.80086	3.48282e-06	7.65652e-05	3.38606
TNKS1BP1	-4.505	13.8508	-4.79639	3.55176e-06	7.80153e-05	3.36717
DEF6	-2.24195	5.22894	-4.79393	3.59024e-06	7.87947e-05	3.35679
PFKL	-6.64941	27.6323	-4.79361	3.5953e-06	7.88728e-05	3.35543
EPB41L3	-2.39645	4.18647	-4.78774	3.689e-06	8.07932e-05	3.33064
KCTD2	-3.4578	14.5647	-4.7802	3.8128e-06	8.30839e-05	3.29884
CSF1	-7.93258	19.9055	-4.77572	3.88824e-06	8.43823e-05	3.27997
HCFC1	-3.54085	12.0597	-4.77507	3.89934e-06	8.45883e-05	3.27722
SUPT6H	-2.77228	12.0497	-4.76673	4.04398e-06	8.7473e-05	3.24214
TMEM8A	-3.85307	15.6017	-4.76213	4.12605e-06	8.91014e-05	3.22278
ITGAX	-2.78373	5.23112	-4.76054	4.15472e-06	8.96704e-05	3.21612
TBC1D1	-2.29987	7.76032	-4.75538	4.24924e-06	9.13482e-05	3.19445
ITGB2	-12.5234	25.2038	-4.75417	4.27174e-06	9.16817e-05	3.18937
SUN2	-6.80217	19.7304	-4.75366	4.28139e-06	9.18098e-05	3.18719
EPB41L1	-3.88832	11.1726	-4.75357	4.28295e-06	9.18098e-05	3.18684
CBX6	-3.3602	9.96227	-4.75127	4.32612e-06	9.25084e-05	3.17719
PLXDC2	-2.89633	6.16639	-4.74959	4.35785e-06	9.30731e-05	3.17015
AGFG2	-2.81098	9.07475	-4.74081	4.52777e-06	9.63887e-05	3.13332
SH3PXD2B	-5.19736	14.3856	-4.73755	4.59226e-06	9.74453e-05	3.1197
KIF1C	-4.02316	14.9449	-4.73524	4.63868e-06	9.81922e-05	3.11002
CNTNAP1	-4.5739	11.4019	-4.73254	4.69346e-06	9.9112e-05	3.09872
IFFO1	-2.91487	10.0631	-4.72731	4.80131e-06	0.000101064	3.07685
EFCAB14	-4.467	21.5505	-4.72067	4.94156e-06	0.00010356	3.04913
TGFB1	-10.5763	27.6569	-4.69695	5.47613e-06	0.000113226	2.95028
PICALM	-5.02766	30.5728	-4.69384	5.55021e-06	0.000114577	2.93736
VPS39	-2.70136	13.2183	-4.6837	5.79861e-06	0.000119283	2.89524
SBF1	-4.50565	12.4584	-4.68258	5.82669e-06	0.000119767	2.89059
GALNT10	-3.69513	9.98202	-4.68159	5.85163e-06	0.000120185	2.88648
TBC1D5	-2.01751	7.93562	-4.68031	5.88392e-06	0.000120666	2.88119
LHFPL2	-3.56218	10.1548	-4.67758	5.95377e-06	0.000121854	2.86983
GPAT4	-2.28496	9.81744	-4.67409	6.04387e-06	0.000123602	2.85539
C7orf43	-2.21912	8.934	-4.66833	6.19571e-06	0.000126166	2.83152
HPS1	-2.3317	7.12908	-4.65644	6.5206e-06	0.000132014	2.78238
TPP1	-22.6649	67.0234	-4.65504	6.55997e-06	0.000132606	2.77659
CHST1	-4.27921	7.75259	-4.64549	6.8344e-06	0.000137413	2.73719
AKAP17A	-2.81862	9.56692	-4.63913	7.02348e-06	0.000140676	2.71095
FLNB	-2.28841	4.47275	-4.63648	7.10382e-06	0.000141906	2.70002
DCTN1	-4.14772	17.3366	-4.62318	7.51958e-06	0.000149189	2.64535
ABCA3	-5.22159	16.3924	-4.61971	7.63199e-06	0.00015102	2.63109
ARHGEF4	-3.74843	8.81659	-4.61908	7.65253e-06	0.000151199	2.62851
WBP2	-10.9378	48.5582	-4.61465	7.7987e-06	0.000153624	2.61033
SPTBN1	-7.45846	26.8786	-4.61407	7.81811e-06	0.000153891	2.60794
MAP1B	-19.6043	49.3595	-4.60354	8.17737e-06	0.000159765	2.56477
LIMK2	-3.02432	8.63014	-4.60255	8.21209e-06	0.000160376	2.5607
TMEM94	-3.87019	14.834	-4.60238	8.21783e-06	0.000160376	2.56003
FAM102A	-6.60493	19.0935	-4.59789	8.3766e-06	0.000162951	2.54165
MT-ATP6	-1607.83	4149.09	-4.59658	8.42334e-06	0.000163778	2.5363
ADA2	-5.27807	9.64158	-4.59617	8.43799e-06	0.00016388	2.53463
MADD	-2.24209	7.74817	-4.58673	8.78386e-06	0.000169907	2.49605
LSS	-3.34516	11.946	-4.58273	8.93465e-06	0.000172252	2.4797
MAP3K6	-2.40314	5.78266	-4.57751	9.1347e-06	0.000175464	2.45844
EPB41L2	-4.79369	14.6737	-4.57142	9.37394e-06	0.000179534	2.43361
GAS7	-7.8866	16.8607	-4.5704	9.41457e-06	0.000180181	2.42946
PTPN13	-2.61199	7.47241	-4.56347	9.69525e-06	0.000185013	2.40125
PLD2	-2.98257	9.26179	-4.56329	9.70271e-06	0.000185088	2.40051
AC132812.1	-2.22747	5.56747	-4.56284	9.7214e-06	0.000185378	2.39867
MGAT4B	-3.9706	17.3127	-4.56146	9.77838e-06	0.000186261	2.39306
HK1	-5.76896	20.6048	-4.55969	9.85165e-06	0.000187445	2.38589
CABIN1	-3.12769	10.594	-4.55736	9.9496e-06	0.000188992	2.37639
HGS	-2.02129	9.68275	-4.55475	1.00598e-05	0.000190791	2.36582
G6PD	-4.15058	16.6311	-4.55388	1.0097e-05	0.000191358	2.36228
PTPN18	-2.46109	10.9736	-4.54167	1.06317e-05	0.000200334	2.31275
RETSAT	-4.65779	18.6493	-4.54087	1.06675e-05	0.000200931	2.30952
MCM3AP	-2.00024	8.36071	-4.53144	1.11008e-05	0.000207832	2.27131
ENG	-11.7969	33.1689	-4.52646	1.13363e-05	0.000211454	2.25117
HMGXB3	-2.00315	10.3218	-4.52435	1.14373e-05	0.000213068	2.24266
SASH1	-2.4578	7.19627	-4.52104	1.15978e-05	0.000215493	2.22929
SCRIB	-5.75381	19.0515	-4.51345	1.19741e-05	0.00022134	2.19866
ZNFX1	-2.43646	8.54077	-4.50558	1.23766e-05	0.000227668	2.16694
MICALL2	-3.19673	6.90959	-4.50557	1.23772e-05	0.000227668	2.1669
HS6ST1	-6.03087	19.2883	-4.50007	1.26661e-05	0.00023217	2.14477
MTATP6P1	-229.016	579.947	-4.49279	1.30584e-05	0.000238527	2.11552
KLHL21	-2.72165	9.06795	-4.48868	1.32855e-05	0.00024217	2.09899
MAPKAPK2	-5.37588	27.174	-4.46369	1.47482e-05	0.000265802	1.99886
AHDC1	-3.95336	9.56681	-4.45146	1.55193e-05	0.000277871	1.95002
NRBP2	-6.54557	17.3634	-4.45035	1.55911e-05	0.000278684	1.9456
LRP10	-7.48572	27.7481	-4.44148	1.61768e-05	0.000287584	1.91027
GORASP1	-2.09071	10.8153	-4.44082	1.62213e-05	0.000288276	1.90764
DHX38	-2.50402	9.67683	-4.43573	1.65683e-05	0.000293153	1.88737
PIP5K1C	-3.33732	13.4816	-4.4328	1.67705e-05	0.000296132	1.87574
H6PD	-3.30146	9.03344	-4.4312	1.68825e-05	0.000297809	1.86937
KIAA0513	-2.59814	4.39604	-4.42548	1.72875e-05	0.000304544	1.84667
AXL	-4.55285	14.0923	-4.42065	1.7637e-05	0.000309272	1.82749
LAMP1	-11.9564	52.8135	-4.41266	1.82303e-05	0.000318561	1.79581
TNS1	-2.96327	8.81609	-4.41187	1.82904e-05	0.000319319	1.79266
ALAD	-3.18605	13.6323	-4.40664	1.86899e-05	0.000325535	1.77198
LRP1	-16.1922	40.0164	-4.40344	1.89391e-05	0.000329439	1.75929
MPRIP	-2.3814	10.2303	-4.40081	1.91459e-05	0.000332374	1.7489
KIAA0100	-3.38509	15.2737	-4.39969	1.9234e-05	0.000333464	1.7445
HSPA7	-2.4941	3.7853	-4.3965	1.94891e-05	0.000336995	1.73189
SLC43A2	-2.29814	7.20389	-4.39049	1.9978e-05	0.000344542	1.70817
SPRYD3	-5.99107	20.79	-4.39021	2.00016e-05	0.000344836	1.70704
HDAC11	-2.02877	5.69424	-4.37608	2.11998e-05	0.000363227	1.65137
NMT1	-2.92073	19.8564	-4.37211	2.15485e-05	0.000368479	1.63576
ZHX3	-3.00998	9.93103	-4.36053	2.25981e-05	0.000384349	1.59026
PLXNB3	-4.18265	8.14265	-4.35644	2.29807e-05	0.000389322	1.5742
CIC	-3.48363	12.9051	-4.35018	2.35777e-05	0.00039784	1.54967
SLCO2B1	-9.75694	18.8683	-4.34011	2.45695e-05	0.00041138	1.51027
PI4KA	-3.14868	8.55151	-4.33318	2.52749e-05	0.000421759	1.48321
MT-CYB	-1252.53	2867.53	-4.32881	2.57305e-05	0.000428817	1.46613
PLXNA1	-3.37129	8.33276	-4.3279	2.58257e-05	0.000430131	1.46259
WIPF2	-2.21548	9.61099	-4.32518	2.61141e-05	0.000434108	1.45198
ZNF710-AS1	-3.64145	9.51687	-4.31924	2.67542e-05	0.000443205	1.42883
WNK1	-4.37758	14.6998	-4.31351	2.73855e-05	0.000452663	1.40654
ITGB4	-13.2818	22.0418	-4.31161	2.75989e-05	0.000455759	1.39912
CRB2	-5.63502	9.42177	-4.30811	2.79942e-05	0.000461416	1.38553
LAMB2	-10.7726	37.539	-4.30705	2.81154e-05	0.000462979	1.3814
ABLIM1	-3.90372	10.9726	-4.30504	2.8346e-05	0.00046619	1.3736
CTSZ	-46.142	80.7026	-4.29859	2.90984e-05	0.00047722	1.34857
WDR1	-7.48425	42.2397	-4.29273	2.97989e-05	0.00048749	1.32584
SPTAN1	-8.87334	31.9542	-4.29159	2.99369e-05	0.000489289	1.32143
WAS	-3.72241	9.02707	-4.29101	3.00078e-05	0.000490143	1.31917
CHP1	-2.87366	18.5345	-4.28937	3.02075e-05	0.000493099	1.31283
KIFC2	-2.54244	6.06977	-4.28634	3.0581e-05	0.00049873	1.30109
ECE1	-8.9471	24.4414	-4.28396	3.08769e-05	0.000503087	1.2919
SRF	-3.27804	12.449	-4.2818	3.11489e-05	0.000507047	1.28352
TBC1D10B	-2.07101	13.6619	-4.28156	3.11783e-05	0.000507109	1.28262
GRN	-24.9905	81.8282	-4.27935	3.14595e-05	0.000510835	1.27404
RAB36	-2.08574	5.11388	-4.27607	3.18797e-05	0.000516539	1.26137
SGSM2	-3.01342	9.99649	-4.27548	3.19558e-05	0.000517453	1.2591
APBB1IP	-4.51134	10.4582	-4.26337	3.35579e-05	0.000540064	1.21239
LPIN2	-3.0774	11.7663	-4.26073	3.39183e-05	0.000544499	1.20219
GTF3C1	-2.24519	9.86471	-4.25853	3.42203e-05	0.000548538	1.19372
CDK18	-5.59392	9.18436	-4.25226	3.50957e-05	0.000560516	1.16961
IRAK1	-7.79549	38.9788	-4.24688	3.58654e-05	0.000571767	1.1489
TIMP2	-31.6206	111.672	-4.24489	3.6154e-05	0.000575493	1.14126
SYK	-2.91656	6.58856	-4.24435	3.62315e-05	0.000576028	1.13921
SMG5	-4.45904	20.6595	-4.2393	3.69762e-05	0.000586447	1.1198
BACE1	-3.44948	15.808	-4.2383	3.71246e-05	0.000588622	1.11598
NCKIPSD	-2.47057	11.5642	-4.22992	3.83955e-05	0.000606658	1.08386
ARHGEF1	-2.12592	8.87162	-4.22953	3.8455e-05	0.000607333	1.08238
LAMA5	-2.69846	6.39663	-4.22602	3.90014e-05	0.000615407	1.06892
SYNM	-4.93691	12.4813	-4.2258	3.90359e-05	0.000615766	1.06808
SLC7A8	-2.65767	4.86253	-4.22094	3.98046e-05	0.000625635	1.04947
INTS1	-4.2468	15.4479	-4.21263	4.11508e-05	0.000644558	1.01775
TCIRG1	-3.8528	9.24597	-4.2126	4.11559e-05	0.000644558	1.01763
MAPK8IP3	-3.75612	9.98556	-4.20738	4.20246e-05	0.000655037	0.99771
MGLL	-3.52541	11.6853	-4.20516	4.23989e-05	0.000659697	0.989254
ATN1	-18.0401	65.7514	-4.20199	4.29388e-05	0.000667701	0.977189
CD37	-3.70302	8.19985	-4.2013	4.30579e-05	0.000669157	0.974547
MTX1P1	-2.84609	7.03647	-4.1984	4.35605e-05	0.000676166	0.963483
PARP3	-3.22442	11.0933	-4.19223	4.46452e-05	0.000691369	0.940032
MAST3	-2.54291	4.88134	-4.18299	4.63194e-05	0.000713088	0.90494
NCKAP1L	-2.19713	4.81868	-4.1829	4.63368e-05	0.000713146	0.904584
FCGBP	-23.0981	38.8339	-4.18262	4.63881e-05	0.000713607	0.903528
ITGB5	-6.3717	16.0425	-4.1712	4.85437e-05	0.000740813	0.860241
NCOR2	-5.31139	16.9875	-4.16847	4.90746e-05	0.000746692	0.849877
CDC42BPB	-3.23047	12.8794	-4.16823	4.91207e-05	0.000747014	0.848981
TMEM109	-5.5159	28.7928	-4.16782	4.92011e-05	0.00074802	0.847423
CD4	-8.80441	20.4782	-4.16648	4.94624e-05	0.000751338	0.842377
SFXN5	-4.47717	13.3111	-4.16246	5.0259e-05	0.000761237	0.827154
BAIAP3	-5.59807	8.84827	-4.16201	5.03491e-05	0.000762161	0.825449
HEPH	-2.29816	3.6981	-4.16126	5.04982e-05	0.000763979	0.82263
ATG9A	-2.30187	12.5817	-4.15927	5.08993e-05	0.000768716	0.815095
FAM234A	-2.82211	14.0012	-4.15907	5.09402e-05	0.000769113	0.814329
KIF1A	-10.9013	20.841	-4.15544	5.16772e-05	0.000778451	0.800644
TGFBR2	-6.08352	15.1171	-4.15434	5.1904e-05	0.00078065	0.796474
MAP1S	-2.21188	10.9299	-4.1471	5.34128e-05	0.00080046	0.769181
AC093010.3	-11.604	31.3881	-4.14538	5.3778e-05	0.000804555	0.762691
KCNAB2	-2.79507	4.42593	-4.13136	5.68417e-05	0.000845091	0.709934
LMF2	-6.66925	26.0275	-4.12174	5.90384e-05	0.000873299	0.673837
PACS2	-2.93033	9.75874	-4.12156	5.90805e-05	0.000873676	0.673159
CAPN2	-5.41735	24.6803	-4.11799	5.99176e-05	0.000884311	0.659767
CSF3R	-2.12084	4.09964	-4.11786	5.99476e-05	0.000884504	0.659291
EHD3	-3.24699	7.20928	-4.11498	6.06325e-05	0.000892604	0.648478
GNAI2	-12.1049	77.1524	-4.10536	6.29696e-05	0.000923642	0.612487
PTAFR	-3.03271	6.34415	-4.10393	6.33235e-05	0.000928056	0.607154
SEMA3B	-4.71213	9.07681	-4.0928	6.61503e-05	0.000962967	0.565606
HDLBP	-6.56461	30.741	-4.09275	6.61642e-05	0.000962967	0.565405
ZNF703	-3.42423	11.268	-4.08938	6.7043e-05	0.000974677	0.552855
ETS2	-3.799	11.7937	-4.0886	6.72472e-05	0.000976564	0.549962
DAB2	-3.65422	6.90312	-4.08487	6.82368e-05	0.000988201	0.536068
OGDH	-8.02263	33.0899	-4.07895	6.98363e-05	0.00100941	0.514033
SON	-3.59982	17.5409	-4.07408	7.11785e-05	0.00102627	0.49593
TOLLIP	-3.28639	16.3559	-4.07147	7.19068e-05	0.00103375	0.486252
SLC2A5	-5.46509	11.2104	-4.06542	7.36245e-05	0.00105488	0.463808
SLC12A4	-2.52921	11.2042	-4.06362	7.41447e-05	0.00106117	0.457115
ZC3H7B	-3.06272	11.6279	-4.06081	7.49601e-05	0.00107004	0.446717
NORAD	-12.9253	70.0734	-4.06	7.51987e-05	0.00107187	0.443697
FNBP1	-2.55975	10.4731	-4.05939	7.53772e-05	0.00107359	0.441443
MT-ND1	-1088.08	2691.74	-4.05066	7.79821e-05	0.00110674	0.409154
COL5A3	-5.22703	11.0651	-4.0465	7.9254e-05	0.00112236	0.393779
FERMT3	-4.24088	11.3193	-4.04021	8.12154e-05	0.00114489	0.37055
A2M	-82.5119	182.773	-4.03033	8.43899e-05	0.00118518	0.334125
INPPL1	-5.1037	22.333	-4.02913	8.47826e-05	0.00118911	0.329715
HPCAL1	-2.14012	7.20584	-4.02765	8.52718e-05	0.00119501	0.324251
NR1D1	-4.44438	9.92424	-4.02429	8.63868e-05	0.00120677	0.311912
PTPN1	-2.81685	15.4913	-4.02295	8.68382e-05	0.00121243	0.306962
GGT5	-2.97127	8.57967	-4.02113	8.74512e-05	0.00121905	0.300282
NCDN	-11.3746	20.65	-4.0204	8.76971e-05	0.00122182	0.297615
SCAP	-3.68266	18.4956	-4.01858	8.83164e-05	0.00122897	0.290933
NCOA1	-2.66144	11.1166	-4.01794	8.85368e-05	0.00123131	0.288566
SLC41A1	-3.38054	11.1747	-4.01577	8.92812e-05	0.00124027	0.280616
GPRC5B	-14.7725	52.7451	-4.01491	8.95785e-05	0.00124342	0.277459
MT-CO2	-1854.99	5623.08	-4.00922	9.15711e-05	0.00126639	0.25657
VSIR	-5.6675	15.8996	-4.00862	9.17829e-05	0.00126865	0.254377
CD93	-4.95949	12.1426	-4.00507	9.30486e-05	0.00128304	0.241374
MAN1C1	-5.35845	11.5276	-4.00485	9.31308e-05	0.00128323	0.240537
CYTH4	-2.085	5.06595	-4.00021	9.48121e-05	0.00130229	0.223553
MRTFA	-2.07942	8.72102	-3.98876	9.90837e-05	0.00134896	0.18173
HSPG2	-2.72618	5.51589	-3.98732	9.96358e-05	0.00135542	0.176456
UBA7	-3.48934	10.2713	-3.98328	0.000101195	0.00137485	0.161726
ABHD2	-6.15924	15.6198	-3.97865	0.00010301	0.00139518	0.144855
DYNLL2	-6.22504	26.4044	-3.97698	0.000103675	0.00140311	0.138748
PARP10	-3.6734	8.88675	-3.97518	0.000104394	0.00141138	0.132194
STAB1	-9.08452	16.2489	-3.97306	0.000105245	0.00142142	0.124492
SPI1	-9.16316	24.1873	-3.97054	0.000106267	0.00143342	0.115329
MLEC	-7.134	31.1383	-3.96596	0.000108149	0.00145614	0.0986775
ALOX5	-3.99799	7.84546	-3.96087	0.000110279	0.00148102	0.0801854
PDGFB	-2.84074	9.37306	-3.9567	0.000112053	0.00150255	0.0650461
CHST6	-2.75851	5.35794	-3.95631	0.000112217	0.00150397	0.0636611
NACAD	-3.92322	12.3627	-3.95372	0.000113334	0.00151662	0.0542707
CHST3	-3.09328	7.99208	-3.95083	0.000114596	0.00152988	0.0437727
MAP4K4	-5.64883	23.9038	-3.94981	0.00011504	0.00153436	0.0401095
SMPD1	-4.92624	26.1203	-3.94934	0.000115247	0.00153595	0.0384028
MPP1	-2.29281	7.79847	-3.94749	0.000116065	0.00154549	0.0317006
COL8A1	-4.39868	4.72607	-3.94421	0.00011753	0.00156201	0.0198104
TUBGCP6	-2.38725	6.45418	-3.93825	0.000120231	0.00159227	-0.00172597
CYB5R3	-7.23664	38.037	-3.93782	0.000120426	0.00159392	-0.00326214
ZMIZ1	-3.71514	13.0542	-3.93568	0.000121414	0.0016047	-0.0110084
ATP1A1	-17.3874	75.8209	-3.92951	0.0001243	0.00163749	-0.0332722
MTND4P12	-6.05178	15.7912	-3.91613	0.000130783	0.00171044	-0.0814316
SELPLG	-7.84221	19.0094	-3.91563	0.000131031	0.00171219	-0.0832267
GPR37	-8.57089	19.5123	-3.91355	0.000132072	0.00172173	-0.0907264
ARRDC2	-2.29638	6.14183	-3.9127	0.000132495	0.00172424	-0.0937529
TNFRSF1B	-7.13651	15.6722	-3.90661	0.000135593	0.00175932	-0.115639
ESYT1	-3.06476	14.1304	-3.90058	0.000138725	0.0017964	-0.137264
TYK2	-3.14667	13.4126	-3.89811	0.000140025	0.00181047	-0.146096
NAGA	-3.497	15.0249	-3.8973	0.000140458	0.00181438	-0.149021
CMTM4	-2.26691	5.99556	-3.88296	0.000148276	0.00190786	-0.200296
PRKCA	-2.59638	10.0189	-3.87398	0.000153378	0.00196191	-0.232307
LILRB4	-3.17855	7.86523	-3.87392	0.000153412	0.00196191	-0.232517
RNF44	-2.02374	8.73025	-3.8687	0.000156455	0.00199506	-0.251099
SLC25A28	-2.59216	15.2466	-3.86658	0.000157712	0.0020081	-0.258671
PARM1	-2.44664	3.61233	-3.85077	0.000167355	0.00211091	-0.314801
GNAO1	-4.58432	12.2119	-3.84777	0.000169251	0.00213278	-0.325455
MT-ATP8	-582.024	1830.1	-3.8442	0.000171525	0.00215626	-0.338071
PARP14	-2.54896	6.64161	-3.84352	0.000171962	0.00216123	-0.340477
SPATA20	-3.75534	13.193	-3.84049	0.000173924	0.00218033	-0.351204
ATP9A	-5.35538	17.446	-3.84046	0.000173944	0.00218033	-0.351314
BCL6	-6.2562	18.9501	-3.84041	0.000173979	0.00218033	-0.351506
MAN2B1	-3.95341	14.6061	-3.84026	0.000174075	0.00218101	-0.352027
PTPN6	-2.03313	6.13375	-3.83513	0.000177448	0.00221903	-0.370166
CTSA	-6.94883	28.7915	-3.83453	0.000177842	0.00222343	-0.372264
VCL	-2.84809	8.91508	-3.83294	0.000178908	0.00223462	-0.37791
BIN1	-5.64479	17.5882	-3.82648	0.000183273	0.00228046	-0.40069
MAPK3	-3.76918	25.5011	-3.82252	0.000186003	0.00231061	-0.414666
ACO2	-7.32153	30.7455	-3.81624	0.000190407	0.00235806	-0.436775
OGFR	-2.19482	11.5076	-3.81572	0.000190776	0.00236039	-0.438601
ACKR1	-3.48286	5.45809	-3.81534	0.000191047	0.00236319	-0.439943
HIPK1	-2.28292	10.164	-3.80886	0.000195707	0.00241401	-0.462709
TPPP	-7.12486	8.57872	-3.80532	0.000198303	0.00243973	-0.475156
SELENON	-24.3602	81.4157	-3.80021	0.000202099	0.00247483	-0.493062
LPAR5	-2.88793	7.1641	-3.79912	0.00020292	0.00248293	-0.496892
APC2	-6.20217	17.4547	-3.79908	0.00020295	0.00248293	-0.497028
GBA	-4.2414	16.6387	-3.79105	0.000209086	0.00254554	-0.525152
PCNX3	-2.11899	8.78489	-3.78912	0.000210587	0.00255788	-0.531906
GRB2	-5.45712	40.7592	-3.77869	0.000218878	0.00264696	-0.568356
TGM2	-4.04208	8.39969	-3.77269	0.000223781	0.00269879	-0.589264
ATP2A2	-5.07138	24.9546	-3.76588	0.000229476	0.00275607	-0.612973
PSAP	-151.298	676.154	-3.762	0.000232784	0.00279071	-0.626477
HIPK2	-5.04025	13.3472	-3.7617	0.000233046	0.0027932	-0.627536
SEPT8	-4.86172	22.1357	-3.76131	0.000233379	0.00279592	-0.628884
ZNF385A	-9.26404	29.4981	-3.75505	0.000238819	0.0028504	-0.650618
RHPN1	-3.54113	8.51329	-3.74883	0.000244351	0.00290285	-0.672212
PLD3	-11.8255	57.1655	-3.746	0.000246904	0.0029292	-0.682013
VWF	-8.28845	21.1695	-3.74135	0.000251155	0.0029691	-0.698109
TRABD	-2.10085	9.62887	-3.73743	0.000254794	0.00300515	-0.71167
RENBP	-3.03703	10.301	-3.73612	0.000256025	0.00301763	-0.716211
ARHGAP23	-2.84465	9.47889	-3.72428	0.000267369	0.00312817	-0.757073
ST6GAL1	-3.9848	11.115	-3.72309	0.000268536	0.00314112	-0.761178
LINC01963	-2.91138	11.3389	-3.72147	0.000270128	0.00315734	-0.766747
C1orf198	-7.34828	20.8718	-3.71959	0.000271993	0.0031759	-0.773229
SMARCA2	-3.04862	12.1457	-3.71232	0.000279315	0.00324982	-0.798252
IFNAR1	-2.14023	15.3657	-3.70348	0.000288463	0.00333776	-0.828605
LRRC25	-2.66944	6.04155	-3.70165	0.000290389	0.00335635	-0.834873
DPYSL2	-21.2038	91.3088	-3.69996	0.000292187	0.00337342	-0.840685
DHCR24	-12.211	26.396	-3.69752	0.00029479	0.00339899	-0.849036
SQSTM1	-8.68883	32.9611	-3.69519	0.000297293	0.00342484	-0.856998
SKI	-5.10688	24.1288	-3.68605	0.000307339	0.00352432	-0.888281
LAIR1	-3.18597	6.84863	-3.68506	0.000308443	0.0035339	-0.891656
MTSS1L	-8.80491	25.9148	-3.68171	0.000312214	0.00356854	-0.903094
TMEM175	-3.40741	12.3036	-3.67772	0.000316769	0.00361117	-0.916724
PLEKHO2	-4.24001	17.6199	-3.67722	0.000317336	0.00361606	-0.918407
CDIP1	-4.96968	22.5232	-3.6767	0.00031794	0.00362215	-0.920196
CTSD	-62.169	186.304	-3.67576	0.00031902	0.00363209	-0.923386
C4B	-2.15803	4.5946	-3.67472	0.000320234	0.00364234	-0.92696
ANK2	-3.18191	10.5198	-3.67385	0.000321238	0.00365022	-0.929906
ACTN4	-11.8566	55.2041	-3.67242	0.000322908	0.00366416	-0.934786
FAM120A	-3.11364	19.7397	-3.65711	0.000341283	0.00383401	-0.986845
LGALS9	-3.95411	11.3043	-3.65598	0.000342672	0.00384879	-0.990665
PADI2	-9.89984	24.6306	-3.65037	0.000349684	0.00391447	-1.00971
GAS2L1	-3.54747	13.9612	-3.64865	0.000351853	0.00393323	-1.01553
INPP5D	-2.71014	6.22057	-3.64862	0.000351896	0.00393323	-1.01564
SORT1	-7.63732	31.6294	-3.64771	0.000353053	0.0039443	-1.01873
PTPRF	-5.72237	17.335	-3.64053	0.000362297	0.00403468	-1.04302
UNC5B	-4.03601	10.153	-3.63929	0.00036391	0.00404921	-1.0472
PLCD3	-5.57243	18.0802	-3.63867	0.00036473	0.00405575	-1.04931
UPF1	-2.48636	12.6607	-3.63515	0.000369372	0.00410042	-1.0612
ERAP1	-2.00918	7.53551	-3.62158	0.000387802	0.00427215	-1.10695
FOSL2	-5.01355	13.9059	-3.62112	0.00038844	0.00427772	-1.10849
TCF25	-2.20472	17.0209	-3.61691	0.000394339	0.00433723	-1.12265
TAF1C	-2.72985	9.77492	-3.61528	0.000396651	0.00435993	-1.12814
PRRC2A	-8.05681	38.0891	-3.60755	0.000407769	0.00445415	-1.1541
SORBS1	-3.60174	13.6225	-3.60609	0.000409899	0.00447462	-1.15899
IL13RA1	-6.29649	22.3243	-3.6049	0.000411641	0.00448711	-1.16298
RAB11FIP3	-3.00505	14.254	-3.59975	0.000419272	0.0045561	-1.18022
CYBB	-8.94918	21.2525	-3.59496	0.000426502	0.00462032	-1.19627
MFSD10	-4.2377	22.1254	-3.59307	0.000429381	0.00464289	-1.20259
PINK1	-2.51602	12.574	-3.588	0.000437206	0.0047207	-1.21953
MT-ND2	-861.262	2336.16	-3.58603	0.000440282	0.00475098	-1.22611
SIN3B	-2.08912	9.31549	-3.58458	0.000442551	0.00477056	-1.23094
HCLS1	-6.74293	16.6654	-3.58389	0.000443641	0.00478132	-1.23324
PRKAR1A	-4.35732	32.0975	-3.57843	0.000452327	0.004855	-1.25144
SLC25A22	-2.39897	9.19404	-3.57723	0.000454263	0.00487279	-1.25544
MAFB	-12.5983	25.0903	-3.57359	0.000460172	0.00493013	-1.26756
SOD3	-4.37614	9.27365	-3.57178	0.000463138	0.00495483	-1.27359
SORBS3	-3.71604	20.1028	-3.55698	0.000488064	0.00518592	-1.32275
CXCL16	-9.48739	36.4693	-3.55696	0.000488097	0.00518592	-1.32281
AATK	-3.18485	4.66305	-3.55629	0.000489252	0.00519714	-1.32503
CLSTN1	-15.5802	72.8178	-3.54798	0.000503824	0.00532285	-1.35254
ARNT2	-6.85209	27.9504	-3.54784	0.000504075	0.00532298	-1.353
TNK2	-3.80255	9.8304	-3.5478	0.00050414	0.00532298	-1.35312
TP53INP2	-12.9121	34.7871	-3.54014	0.000517945	0.00545011	-1.37844
MEGF8	-4.26251	14.9143	-3.53151	0.000533929	0.00559362	-1.40691
MSN	-21.164	97.8708	-3.52898	0.000538682	0.00563106	-1.41521
DDX42	-2.41072	13.4012	-3.52877	0.000539083	0.00563413	-1.41591
IL10RA	-2.5841	5.29016	-3.52247	0.000551156	0.00574347	-1.43665
SEC16A	-2.06262	10.1217	-3.5184	0.000559086	0.00581194	-1.45003
HLA-DOA	-4.82433	11.5595	-3.51723	0.000561383	0.00582799	-1.45387
BAG3	-6.93386	21.6958	-3.513	0.000569762	0.00589259	-1.46774
CYFIP1	-3.99741	19.9149	-3.51237	0.000571013	0.0059032	-1.46979
MRAS	-3.23571	16.7891	-3.50975	0.000576289	0.00594604	-1.4784
NUMA1	-2.65432	10.7254	-3.50657	0.000582736	0.00600076	-1.48881
PPP6R1	-2.1664	12.951	-3.50399	0.00058801	0.00604544	-1.49724
ANKRD40	-2.77101	18.9559	-3.50363	0.000588763	0.00605096	-1.49844
SREBF1	-3.91807	11.7552	-3.50294	0.000590184	0.00606082	-1.5007
LCP1	-5.89232	14.2048	-3.50034	0.000595575	0.00610185	-1.5092
ESYT2	-2.69095	11.7742	-3.49884	0.000598691	0.00612899	-1.51409
C3AR1	-8.10921	20.5574	-3.49742	0.000601664	0.00615104	-1.51872
MFSD1	-3.41592	15.5505	-3.49071	0.000615928	0.0062773	-1.54064
C3	-68.1724	145.241	-3.4901	0.000617243	0.00628704	-1.54264
NEO1	-3.56767	12.4983	-3.48717	0.000623573	0.00634045	-1.55218
STAT2	-5.34265	18.5597	-3.47684	0.000646384	0.00654576	-1.58578
CAPN1	-2.1859	17.5177	-3.47595	0.000648396	0.00656234	-1.58868
SAMHD1	-5.76699	22.9505	-3.47559	0.000649213	0.00656807	-1.58986
GPAA1	-6.80953	41.407	-3.47053	0.000660717	0.00667042	-1.60628
LASP1	-4.61327	26.8147	-3.46914	0.000663914	0.00669873	-1.61079
SLC27A1	-2.0212	7.47069	-3.46237	0.00067969	0.00683034	-1.63274
TUG1	-3.67179	16.9947	-3.4581	0.000689805	0.00691214	-1.64654
AHSA2P	-2.13862	4.98925	-3.45635	0.000694016	0.00694373	-1.65223
CDIPT	-3.14797	25.5291	-3.45525	0.000696659	0.00696221	-1.65578
SLC11A1	-3.85287	8.09501	-3.45157	0.000705589	0.00704074	-1.66768
FAM167A	-4.64451	8.50717	-3.45105	0.000706845	0.00705059	-1.66934
EPHX1	-11.7286	44.766	-3.4478	0.000714839	0.0071141	-1.67984
ATRN	-2.02803	10.6372	-3.44751	0.000715557	0.00711727	-1.68078
AC093535.2	-4.52366	10.218	-3.44115	0.00073142	0.00724522	-1.70126
RNASET2	-2.89733	10.5908	-3.44114	0.000731464	0.00724522	-1.70131
MYRF	-4.0867	5.59886	-3.44007	0.00073416	0.0072637	-1.70475
SLC48A1	-3.56614	15.7693	-3.43663	0.000742923	0.00732556	-1.71583
EIF4G3	-2.13744	11.1326	-3.43481	0.0007476	0.00736086	-1.72169
NACC1	-3.3357	20.3715	-3.4348	0.000747626	0.00736086	-1.72172
LENG8	-10.9237	28.4063	-3.43207	0.000754687	0.00740762	-1.7305
GLG1	-3.64583	17.1028	-3.4309	0.00075772	0.00743226	-1.73424
PFKFB2	-2.37788	5.14314	-3.42998	0.000760129	0.00745277	-1.7372
MT-CO3	-1587.04	5352.75	-3.42549	0.000771964	0.00755655	-1.75162
SEC14L1	-3.86229	13.1029	-3.40444	0.000829751	0.00800872	-1.81897
AC005332.6	-2.9276	17.2187	-3.40419	0.000830464	0.00801413	-1.81977
ZMIZ2	-4.39469	18.4737	-3.40261	0.000834958	0.00804862	-1.8248
ZKSCAN1	-2.0527	9.1322	-3.40163	0.000837778	0.00807123	-1.82795
SLC4A3	-3.155	13.5781	-3.4008	0.000840156	0.00808833	-1.83059
BHLHE40	-11.6038	29.6153	-3.4002	0.000841892	0.00810058	-1.83251
UBE2G2	-2.28717	12.5644	-3.39911	0.000845023	0.00812178	-1.83597
EGR3	-2.88031	4.42736	-3.39472	0.000857788	0.00822189	-1.84995
AP001972.5	-2.77694	5.56738	-3.38341	0.000891516	0.00847707	-1.8859
LZTS3	-2.91633	10.019	-3.38043	0.000900634	0.00855448	-1.89538
STAT3	-4.34392	28.0087	-3.37779	0.000908757	0.00861449	-1.90374
LTBP2	-2.29139	3.37092	-3.37292	0.000923927	0.00872266	-1.91917
ARHGEF10L	-2.37143	9.66172	-3.36535	0.000947971	0.00891697	-1.94309
GLDN	-2.16764	4.29614	-3.3646	0.000950412	0.00893513	-1.94549
MPEG1	-2.41338	3.9798	-3.36434	0.00095123	0.00893881	-1.94629
KIAA1147	-2.19704	9.16437	-3.35817	0.000971356	0.00908	-1.96578
CADM3	-15.3399	28.9771	-3.35448	0.000983559	0.00917121	-1.9774
ADAR	-7.61352	38.7285	-3.35262	0.000989762	0.00921758	-1.98326
DUSP3	-2.39296	16.0852	-3.35175	0.000992675	0.00923653	-1.98599
MERTK	-2.55843	8.13553	-3.34547	0.00101397	0.00938979	-2.00574
BCL2L2	-2.46215	9.38046	-3.34527	0.00101465	0.00939269	-2.00637
DIAPH1	-2.10988	11.7762	-3.34139	0.00102805	0.00949163	-2.01857
CD74	-244.626	692.771	-3.34059	0.00103084	0.00950734	-2.02109
MFN2	-4.1717	28.0765	-3.34035	0.00103167	0.00951338	-2.02185
SCAMP4	-2.86982	18.963	-3.34024	0.00103205	0.00951521	-2.02219
RAP2B	-2.03654	9.80709	-3.33428	0.001053	0.00967266	-2.04088
HCK	-4.07949	10.2968	-3.33253	0.00105921	0.00971948	-2.04635
CAST	-2.02799	9.54952	-3.33183	0.00106171	0.0097255	-2.04855
THBS2	-6.47477	15.1072	-3.32882	0.00107252	0.00980562	-2.05796
TNRC18	-2.62671	10.2675	-3.32597	0.00108285	0.0098909	-2.06687
DYNC1H1	-4.85534	22.344	-3.3237	0.00109114	0.00993957	-2.07397

## Sheet: 79 DEGs
79 differentially expressed genes with prognostic value
Terms	P value
TGM2	2.14216e-06
ANKH	0.000222242
FURIN	0.000231664
PXN	0.000441011
SMPD1	0.000977748
IL4R	0.00103529
HGSNAT	0.00170086
HPS1	0.00190916
HPCAL1	0.00245967
MGAT4B	0.00294804
LTBP2	0.00315102
HSPA7	0.00335955
TCIRG1	0.00375285
ANXA11	0.00388284
PLD3	0.00393963
ITGB5	0.00541667
PLBD2	0.00541938
SLC9A1	0.00655547
TBC1D1	0.00717282
MYO1C	0.00873364
CTSA	0.00917631
SOD3	0.0133069
TOLLIP	0.0140261
FERMT3	0.0146714
SIPA1	0.0152913
LYNX1	0.0156878
ITGAM	0.0157099
ALOX5	0.015922
LAIR1	0.0167413
ARHGAP30	0.0178931
DAB2	0.0183358
ENG	0.0183501
CAST	0.0198044
MFSD1	0.0209604
IL13RA1	0.0215198
MLEC	0.0218924
SLC25A22	0.0225764
FLII	0.0231012
CSNK1D	0.0249022
COL8A1	0.0249948
HK1	0.025267
SLC43A2	0.0259125
SLC11A1	0.0259928
SLC15A3	0.0273164
FMNL1	0.0277038
PLA2G15	0.0281225
RAB11FIP5	0.0287654
SPATA20	0.0293764
HS6ST1	0.0296407
MAFK	0.0298049
LCP1	0.0320781
STAT3	0.0336051
ESYT2	0.0339495
ARHGAP4	0.0342348
RAP2B	0.0345164
SH2B3	0.034963
HEPH	0.037215
PLXND1	0.0373395
TNFRSF1B	0.0383369
FOSL2	0.0391573
MYO1F	0.0398649
PRKCD	0.0400814
ATP13A2	0.0405222
GPAA1	0.0415802
KCTD2	0.0419558
CYTH4	0.0425133
SPI1	0.0431563
MPP1	0.0438462
PTPN6	0.0447108
PLXNA1	0.0451396
SLC12A7	0.0453729
EHBP1L1	0.0454789
PLEKHO2	0.04584
MICALL2	0.0464163
PTPN1	0.0482073
MAF	0.0484471
MAN2B2	0.0487909
LRRC25	0.0488069
TAPBP	0.0489027

## Sheet: 64 indentified DEGs
64 genes were validated to be significantly related to the poor prognosis in the CGGA dataset
gene	pvalue
ALOX5	4.50796e-11
CAST	2.23569e-08
ENG	3.98094e-07
FERMT3	6.632e-05
FMNL1	0.0220973
FOSL2	1.92069e-14
FURIN	2.06216e-09
HS6ST1	8.01008e-07
IL13RA1	1.02685e-07
IL4R	2.98978e-09
ITGAM	0.000712036
MAF	0.0160001
MICALL2	0.00391156
MYO1C	8.75411e-13
PLXNA1	1.12429e-06
PLXND1	0.000984742
PRKCD	0.000871692
PTPN1	2.78304e-05
PTPN6	0.0240773
PXN	4.81156e-10
SLC11A1	7.10543e-15
SLC12A7	1.93179e-13
SLC9A1	8.96508e-09
SPI1	0.000882761
STAT3	0.000155887
TGM2	0.0378903
TNFRSF1B	0.0144443
ARHGAP30	6.37003e-05
ARHGAP4	0.0324165
COL8A1	0
CSNK1D	2.20005e-09
CTSA	1.89167e-07
CYTH4	0.00325434
DAB2	0.00571959
ESYT2	0.0115911
FLII	0.0336802
HEPH	0.00727577
HGSNAT	0.00232331
HPS1	0.00016204
HSPA7	0
ITGB5	1.67576e-06
KCTD2	0.000153005
LAIR1	2.3103e-09
LCP1	0.00119922
LRRC25	1.67613e-09
LTBP2	2.6757e-06
LYNX1	2.43263e-06
MAFK	6.81269e-08
MAN2B2	1.1457e-05
MFSD1	8.41809e-06
MGAT4B	1.74325e-08
MLEC	7.657e-07
MYO1F	5.39079e-11
PLA2G15	0.00474937
PLD3	0.000529314
PLEKHO2	0.0241799
RAB11FIP5	0.00424806
RAP2B	2.06638e-11
SH2B3	1.92651e-05
SLC43A2	0.0315562
SOD3	9.089e-10
TBC1D1	6.71777e-11
TCIRG1	1.73697e-06
TOLLIP	0.000922524
