# Supplementary material for: Malignant Evaluation and Clinical Prognostic Values of m6A RNA Methylation Regulators in Glioblastoma
Source: Front Oncol. 2020 Mar 9;10:208. doi: 10.3389/fonc.2020.00208 (PMC7075451; doi:10.3389/fonc.2020.00208)
Supplement: Supplementary file 5 [file Table_4.XLSX]

## Sheet: Sheet1
top 89 compounds capable of repressing the above gene expression of GBM
name	description	belongs_to	CMap connectivity score
calyculin	protein phosphatase inhibitor		99.22
tandutinib	FLT3 inhibitor, KIT inhibitor, PDGFR tyrosine kinase receptor inhibitor	PDGFR/KIT inhibitor	99.13
latrunculin-b	actin destabilizer, unidentified pharmacological activity		98.2
MK-1775	wee1 kinase inhibitor		98.04
erythrosine	food coloring agent		97.7
AKT-inhibitor-1-2	AKT inhibitor, PI3K inhibitor		97.22
epothilone	inhibition of microtubulefunction, microtubule stabilizing agent, microtubule stimulant, tubulin inhibitor	Tubulin inhibitor	96.97
panobinostat	HDAC inhibitor, apoptosis stimulant, cell cycle inhibitor	HDAC inhibitor	96.84
7b-cis	exportin antagonist		96.55
crizotinib	ALK tyrosine kinase receptor inhibitor, c-Met inhibitor, hepatocyte growth factor receptor inhibitor, tyrosine kinase inhibitor		96.48
UK-356618	metalloproteinase inhibitor		96.36
floxuridine	DNA synthesis inhibitor, MDCK inhibitor, PEPT1 inhibitor, pyrimidine antagonist		96.35
BRD-K15107389	ribosomal protein inhibitor		96.23
docetaxel	tubulin inhibitor, microtubule depolymerization inhibitor, microtubule stabilizing agent, microtubule stimulant, taxane	Tubulin inhibitor	95.81
apicidin	HDAC inhibitor	HDAC inhibitor	95.6
bosutinib	src inhibitor, Abl kinase inhibitor, Bcr-Abl kinase inhibitor, apoptosis stimulant, STAT inhibitor	SRC inhibitor	95.23
amlodipine	breast cancer resistance protein inhibitor, calcium channel blocker, calcium channel inhibitor, L-type calcium channel blocker	Calcium channel blocker	95.13
ethylestrenol	anabolic steroid, has some progesterone-like activity	Progesterone receptor agonist, Progesterone receptor antagonist	94.4
torin-2	mTOR inhibitor	MTOR inhibitor	94.4
sertraline	serotonin receptor antagonist, serotonin reuptake inhibitor, serotonin uptake inhibitor	Serotonin receptor antagonist	94.11
GR-127935	serotonin receptor antagonist	Serotonin receptor antagonist	94.04
cytochalasin-d	actin polymerization inhibitor, actin stabilizer		94.01
ENMD-2076	Aurora kinase inhibitor, FLT3 inhibitor, VEGFR inhibitor, angiogenesis inhibitor, colony stimulating factor receptor antagonist, ephrin receptor inhibitor, FGFR inhibitor, KIT inhibitor, PDGFR tyrosine kinase receptor inhibitor, src inhibitor	Aurora kinase inhibitor	93.71
tetrindole	monoamine oxidase inhibitor		93.66
mibefradil	T-type calcium channel blocker, angiogenesis inhibitor, calcium channel blocker, calcium channel inhibitor, L-type calcium channel blocker, sodium channel blocker	T-type calcium channel blocker	93.5
tivozanib	VEGFR inhibitor, KIT inhibitor, tyrosine kinase inhibitor	PDGFR/KIT inhibitor, VEGFR inhibitor	93.48
DL-PDMP	ceramide glucosyltransferase inhibitor, glucosyltransferase inhibitor		93.45
mebendazole	acetylcholinesterase inhibitor, microtubule inhibitor, tubulin inhibitor	Tubulin inhibitor	93.26
doxorubicin	topoisomerase inhibitor, DNA intercalating drug		93.2
KU-0060648	DNA dependent protein kinase, DNA dependent protein kinase inhibitor, PI3K inhibitor	DNA dependent protein kinase inhibitor, PI3K inhibitor	92.91
cucurbitacin-i	inhibitor of STAT3/JAK2 signaling, JAK inhbitor, lipocortin synthesis stimulant, STAT inhibitor		92.88
ISOX	HDAC inhibitor	HDAC inhibitor	92.71
parthenolide	NFkB pathway inhibitor, adiponectin receptor agonist	NFkB pathway inhibitor	92.18
dasatinib	KIT inhibitor, src inhibitor, Bcr-Abl kinase inhibitor, ephrin receptor inhibitor, PDGFR tyrosine kinase receptor inhibitor, yes kinase inhibitor, Abl kinase inhibitor, Bruton's tyrosine kinase (BTK) inhibitor, discoidin domain containing receptor Inhibitor, lymphocyte specific tyrosine kinase inhibitor, tyrosine kinase inhibitor	SRC inhibitor	92.18
maprotiline	norepinephrine reputake inhibitor, tricyclic antidepressant (TCA)		91.91
AZD-7762	CHK inhibitor		91.8
XE-991	acetylcholine release enhancer, potassium channel blocker, voltage-gated potassium channel blocker		91.51
amiodarone	acetylcholine receptor ligand, adrenergic receptor antagonist, ATP-sensitive potassium channel inhibitor, HCN (hyperpolarization activated cyclic nucleotide gated) channel modulator, polarization inhibitor, potassium channel antagonist, Sodium Channel Blockers, voltage-gated sodium channel blocker		91.37
auranofin	disease modifying antirheumatic drug, immunosuppressant, NFkB pathway inhibitor, prostanoid receptor inhibitor, thioredoxin reductase inhibitor	NFkB pathway inhibitor	91.31
RS-39604	serotonin receptor antagonist	Serotonin receptor antagonist	91.28
triamcinolone	antiinflammatory agent, corticosteroid agonist, corticosteroid binding globulin binder, corticosteroid hormone receptor agonist, cytochrome P450 inhibitor, glucocorticoid receptor agonist, immunosuppressant, immunosuppressive agent		91.1
NPI-2358	tubulin inhibitor, angiogenesis inhibitor, tubulin polymerisation inhibitor	Tubulin inhibitor	90.93
APHA-compound-8	HDAC inhibitor	HDAC inhibitor	90.64
SA-792709	retinoid receptor agonist		90.63
triflupromazine	acetylcholine receptor ligand, dopamine receptor	Dopamine receptor antagonist	90.42
clobetasol	glucocorticoid receptor agonist		90.38
ipratropium	acetylcholine receptor antagonist		90.22
vinblastine	microtubule formation inhibitor, tubulin inhibitor, tubulin polymerisation inhibitor		90.07
pinacidil	ATP channel activator, potassium channel agonist		-90.6
dovitinib	EGFR inhibitor, FGFR inhibitor, FLT3 inhibitor, PDGFR tyrosine kinase receptor inhibitor, VEGFR inhibitor, angiogenesis inhibitor, FGFR antagonist, KIT inhibitor, VEGFR antagonist	EGFR inhibitor, FGFR inhibitor, VEGFR inhibitor	-90.66
BRD-A61189834	XIAP inhibitor		-90.76
deoxycholic-acid	biliverdin reductase A activator, G protein coupled receptor agonist, unidentified pharmacological activity		-90.76
HLI-373	MDM inhibitor	MDM inhibitor	-91.16
YS-035	calcium channel blocker		-91.72
losartan	angiotensin receptor antagonist		-91.8
darinaparsin	apoptosis stimulant, NADPH oxidase stimulant		-92.03
flupirtine	glutamate receptor antagonist, apoptosis inhibitor, opioid receptor agonist, potassium channel agonist		-92.21
felbamate	carbonic anhydrase inhibitor, GABA receptor modulator, glutamate receptor blocker		-92.43
rifapentine	DNA directed RNA polymerase inhibitor, DNA directed DNA polymerase inhibitor		-92.49
rilmenidine	adrenergic receptor agonist, imidazoline receptor agonist	Imidazoline ligand	-92.53
RK-682	heparanase inhibitor, tyrosine phosphatase inhibitor		-93.25
cilomilast	phosphodiesterase inhibitor, interleukin synthesis inhibitor, tumor necrosis factor production inhibitor		-93.89
orantinib	PDGFR tyrosine kinase receptor inhibitor, FGFR inhibitor, VEGFR inhibitor, angiogenesis inhibitor, apoptosis stimulant, Aurora kinase inhibitor, FGFR antagonist, fibroblast growth factor receptor (FGFR) antagonist, fibroblast growth factor receptor inhibitor, kinase insert domain receptor inhibitor, platelet-derived growth factor receptor (PDGFR) inhibitor, serine/threonine kinase inhibitor, vasc…	FGFR inhibitor	-94.01
TG100-115	PI3K inhibitor		-94.03
triprolidine	histamine receptor antagonist		-94.19
amisulpride	dopamine receptor antagonist		-94.2
efavirenz	HIV reverse transcriptase inhibitor, non-nucleoside reverse transcriptase inhibitor, reverse transcriptase inhibitor		-94.64
L-2167	PPAR receptor agonist		-95.04
cilastatin	dehydropeptidase inhibitor		-95.3
tyrphostin-AG-1295	FLT3 inhibitor, PDGFR tyrosine kinase receptor inhibitor		-95.88
cinnarizine	calcium ion channel antagonist, histamine receptor antagonist		-96.05
immethridine	histamine receptor agonist		-96.45
etomoxir	carnitine palmitoyltransferase inhibitor, carnitine O-palmitoyltransferase inhibitor, fatty acid oxidation inhibitor		-96.52
olanzapine	dopamine receptor antagonist, serotonin receptor antagonist		-96.58
piperacillin	cell wall synthesis inhibitor		-96.8
geranylgeraniol	farnesyltransferase inhibitor		-96.81
lopinavir	HIV protease inhibitor	HIV protease inhibitor	-97.09
enalaprilat	angiotensin converting enzyme inhibitor		-97.45
tienilic-acid	sodium/potassium/chloride transporter inhibitor, uric acid diuretic		-97.72
rhapontin	apoptosis inducer		-97.76
cholic-acid	ferrochelatase inhibitor, unidentified pharmacological activity	Bile acid	-98.45
sitagliptin	dipeptidyl peptidase inhibitor, HMGCR inhibitor, insulin secretagogue, tumor necrosis factor expression inhibitor		-98.48
sirolimus	mTOR inhibitor, CCR expression inhibitor, cell cycle inhibitor, proteasome inhibitor, protein kinase inhibitor, T cell inhibitor		-98.82
ARC-239	adrenergic receptor antagonist		-98.84
NECA	adenosine receptor agonist	Adenosine receptor agonist	-98.91
deferiprone	chelating agent, cytochrome P450 inhibitor, iron absorption inhibitor, reducing agent		-99.08
BRD-K07872006	lipoxygenase inhibitor		-99.1
oligomycin-a	ATP synthase inhibitor, ATPase inhibitor		-99.33
PKCbeta-inhibitor	PKC inhibitor		-99.58
