# Supplementary material for: Malignant Evaluation and Clinical Prognostic Values of m6A RNA Methylation Regulators in Glioblastoma
Source: Front Oncol. 2020 Mar 9;10:208. doi: 10.3389/fonc.2020.00208 (PMC7075451; doi:10.3389/fonc.2020.00208)
Supplement: Supplementary file 6 [file Table_5.XLSX]

## Sheet: PPI
104 nodes in the protein protein network
Gene	Degree	LogFC
STAT3	50	4.34392
ITGAM	47	2.90201
ITGB2	46	12.5234
HCK	41	4.07949
CTSD	39	62.169
CYBB	37	8.94918
SPI1	35	9.16316
SLC11A1	33	3.85287
CD4	33	8.80441
C3	31	68.1724
TNFRSF1B	30	7.13651
LCP1	30	5.89232
PXN	29	3.99295
IL10RA	29	2.5841
C3AR1	29	8.10921
PRKCD	28	3.18559
CD74	28	244.626
RAP2B	27	2.03654
PTK2B	27	4.14085
CTSZ	27	46.142
GSN	26	21.7901
LGALS9	25	3.95411
FURIN	25	7.20806
SLC15A3	23	2.9425
TCIRG1	22	3.8528
STAT2	22	5.34265
CTSA	22	6.94883
TLN1	21	12.8977
LRP1	21	16.1922
SQSTM1	20	8.68883
MSN	20	21.164
LAIR1	19	3.18597
IL4R	19	2.59676
GAS7	18	7.8866
STAB1	17	9.08452
MYO1C	17	2.60802
ITGB5	17	6.3717
TOLLIP	16	3.28639
SREBF1	15	3.91807
SOD3	15	4.37614
MICALL2	15	3.19673
LIMK2	15	3.02432
LILRB4	15	3.17855
SMPD1	14	4.92624
SLC2A5	14	5.46509
ITGB4	14	13.2818
IL17RA	14	2.11717
PLD3	13	11.8255
IFNAR1	13	2.14023
HGSNAT	13	3.05986
CD37	13	3.70302
ATP1A1	13	17.3874
ARSA	13	4.05776
THBS2	12	6.47477
RNASET2	12	2.89733
PTPN18	12	2.46109
MAN2B2	12	2.39253
IL13RA1	12	6.29649
MVP	11	6.92162
FNBP1	11	2.55975
TPP1	10	22.6649
TGOLN2	10	9.78383
HEPH	10	2.29816
FLII	10	4.50561
TBC1D9B	9	5.25504
PLXND1	9	8.45056
IQSEC1	9	4.31838
CAST	9	2.02799
STIM1	8	2.83718
SMARCA2	8	3.04862
SLC4A3	8	3.155
SLC12A7	8	2.58792
SH2B3	8	3.57781
PADI2	8	9.89984
OGDH	8	8.02263
NAGA	8	3.497
MAP3K6	8	2.40314
MGAT4B	7	3.9706
MAN2A2	7	2.44749
COL5A3	7	5.22703
TBC1D1	6	2.29987
RAB11FIP5	6	2.01751
MPP1	6	2.29281
KIF3B	6	3.50357
RHBDF2	5	3.83981
LPIN2	5	3.0774
EGR3	5	2.88031
ABR	4	6.69271
NACAD	4	3.92322
MAN1C1	4	5.35845
TRIM14	3	2.76643
SLC25A22	3	2.39897
RAB36	3	2.08574
PARP3	3	3.22442
NCDN	3	11.3746
MFSD1	3	3.41592
DUSP3	3	2.39296
RENBP	2	3.03703
KIAA0319L	2	2.7443
CNTNAP1	2	4.5739
SPATA20	1	3.75534
LHFPL2	1	3.56218
HPS1	1	2.3317
FAM102A	1	6.60493
